# Supplementary material for: Online respondent-driven detection for enhanced contact tracing of close-contact infectious diseases: benefits and barriers for public health practice
Source: BMC Infect Dis. 2021 Apr 16;21:358. doi: 10.1186/s12879-021-06052-4 (PMC8051831; doi:10.1186/s12879-021-06052-4)
Supplement: Supplementary file 3 — Additional file 3. Quantitative results. [file 12879_2021_6052_MOESM3_ESM.pdf]

**Additional file 3, Table 1. Questionnaire respondents' responses to statements related to qualitatively identified themes.**

| <i>Advantages over regular CT-methods</i>                                                                                                                                                      |                          |                            |          |       |
|------------------------------------------------------------------------------------------------------------------------------------------------------------------------------------------------|--------------------------|----------------------------|----------|-------|
| <i>Statement</i>                                                                                                                                                                               | <i>Response category</i> | <i>Response (% , n=70)</i> |          |       |
|                                                                                                                                                                                                |                          | SCABIES                    | SHIGELLA | MUMPS |
| 'In this scenario, I think that with online-RDD I can provide low-key communication options to warn and inform patients and their contacts, compared to regular contact tracing methods.'      | Very much agree          | 25.7                       | 18.6     | 11.4  |
|                                                                                                                                                                                                | Agree                    | 68.6                       | 60       | 41.4  |
|                                                                                                                                                                                                | Neutral                  | 5.7                        | 12.9     | 17.1  |
|                                                                                                                                                                                                | Disagree                 | 0                          | 7.1      | 30    |
|                                                                                                                                                                                                | Very much disagree       | 0                          | 1.4      | 0     |
| 'In this scenario, I think that with online-RDD I can involve patients and their contacts in contact tracing in a way more pleasant to them way, compared to regular contact tracing methods.' | Very much agree          | 4.3                        | 7.1      | 5.7   |
|                                                                                                                                                                                                | Agree                    | 41.3                       | 47.1     | 27.1  |
|                                                                                                                                                                                                | Neutral                  | 40                         | 28.6     | 30    |
|                                                                                                                                                                                                | Disagree                 | 12.9                       | 15.7     | 32.9  |
|                                                                                                                                                                                                | Very much disagree       | 1.4                        | 1.4      | 4.3   |
| 'In this scenario, I think that I can save time with online-RDD, compared to regular contact tracing methods.'                                                                                 | Very much agree          | 17.1                       | 15.7     | 14.3  |
|                                                                                                                                                                                                | Agree                    | 65.7                       | 54.3     | 35.7  |
|                                                                                                                                                                                                | Neutral                  | 12.9                       | 18.6     | 22.9  |
|                                                                                                                                                                                                | Disagree                 | 2.9                        | 11.4     | 21.4  |
|                                                                                                                                                                                                | Very much disagree       | 1.4                        | 0        | 5.7   |
| 'In this scenario, I think that with online-RDD I can reach more contacts of patients, compared to regular contact tracing methods.'                                                           | Very much agree          | 14.3                       | 14.3     | 12.9  |
|                                                                                                                                                                                                | Agree                    | 47.1                       | 41.4     | 30    |
|                                                                                                                                                                                                | Neutral                  | 28.6                       | 28.6     | 15.7  |
|                                                                                                                                                                                                | Disagree                 | 10                         | 15.7     | 41.3  |
|                                                                                                                                                                                                | Very much disagree       | 0                          | 0        | 0     |
| 'In this scenario, I think that online-RDD can reduce the workload for public health professionals (PHPs), compared to regular contact tracing methods.'                                       | Very much agree          | 7.1                        | 10       | 2.9   |
|                                                                                                                                                                                                | Agree                    | 60                         | 45.7     | 34.3  |
|                                                                                                                                                                                                | Neutral                  | 27.1                       | 27.1     | 34.3  |
|                                                                                                                                                                                                | Disagree                 | 4.3                        | 15.7     | 25.7  |
|                                                                                                                                                                                                | Very much disagree       | 1.4                        | 1.4      | 2.9   |
| <i>Challenges for CT with online-RDD</i>                                                                                                                                                       |                          |                            |          |       |
| 'In this scenario, I think that using online-RDD can go at the expense of my contact with patients and their contacts, compared to regular contact tracing methods.'                           | Very much agree          | 2.9                        | 1.4      | 7.1   |
|                                                                                                                                                                                                | Agree                    | 55.7                       | 41.4     | 57.1  |
|                                                                                                                                                                                                | Neutral                  | 30                         | 35.7     | 30    |
|                                                                                                                                                                                                | Disagree                 | 10                         | 20       | 4.3   |
|                                                                                                                                                                                                | Very much disagree       | 1.4                        | 1.4      | 1.4   |
| 'In this scenario, I think that with online-RDD I cannot offer adequate support to patients and their contacts, compared to regular contact tracing methods.'                                  | Very much agree          | 2.9                        | 2.9      | 4.3   |
|                                                                                                                                                                                                | Agree                    | 24.3                       | 17.1     | 45.7  |
|                                                                                                                                                                                                | Neutral                  | 40                         | 40       | 25.7  |
|                                                                                                                                                                                                | Disagree                 | 32.9                       | 38.6     | 21.4  |
|                                                                                                                                                                                                | Very much disagree       | 0                          | 1.4      | 2.9   |
| 'In this scenario, I think that with online-RDD I can miss important contacts, compared to regular contact tracing methods.'                                                                   | Very much agree          | 1.4                        | 14.3     | 2.9   |
|                                                                                                                                                                                                | Agree                    | 35.7                       | 38.6     | 30    |
|                                                                                                                                                                                                | Neutral                  | 37.1                       | 42.9     | 30    |
|                                                                                                                                                                                                | Disagree                 | 25.7                       | 4.3      | 34.3  |
|                                                                                                                                                                                                | Very much disagree       | 0                          | 0        | 2.9   |
| 'In this scenario, I think that with online-RDD I can convey measures to patients and their contacts less adequately, compared to regular contact tracing methods.'                            | Very much agree          | 10                         | 4.3      | 7.1   |
|                                                                                                                                                                                                | Agree                    | 40                         | 34.3     | 44.3  |
|                                                                                                                                                                                                | Neutral                  | 28.6                       | 32.9     | 25.7  |
|                                                                                                                                                                                                | Disagree                 | 21.4                       | 27.1     | 21.4  |
|                                                                                                                                                                                                | Very much disagree       | 0                          | 1.43     | 1.4   |
| 'In this scenario, I think that online-RDD can lead to unnecessary unrest with patients and their contacts, compared to regular contact tracing methods.'                                      | Very much agree          | 0                          | 1.4      | 11.4  |
|                                                                                                                                                                                                | Agree                    | 34.3                       | 24.3     | 51.4  |
|                                                                                                                                                                                                | Neutral                  | 40                         | 41.4     | 24.3  |
|                                                                                                                                                                                                | Disagree                 | 24.3                       | 28.6     | 11.4  |
|                                                                                                                                                                                                | Very much disagree       | 1.4                        | 4.3      | 1.4   |
| <i>Intention</i>                                                                                                                                                                               |                          |                            |          |       |
| 'In this scenario, I would like to make use of online-RDD for CT if it were available at my PHS'                                                                                               | Very much agree          | 10                         | 12.9     | 15.7  |
|                                                                                                                                                                                                | Agree                    | 67.1                       | 48.6     | 21.4  |
|                                                                                                                                                                                                | Neutral                  | 18.6                       | 30       | 27.1  |
|                                                                                                                                                                                                | Disagree                 | 2.9                        | 7.1      | 32.9  |
|                                                                                                                                                                                                | Very much disagree       | 1.4                        | 1.4      | 2.9   |

**Additional file 3, Table 2. Bivariate associations between questionnaire respondents' characteristics and intention to use online-RDD for CT.**

|                                   | Positive intention (n=50) | Neutral/Negative intention (n=20) | Test statistic       | Df | P-value |
|-----------------------------------|---------------------------|-----------------------------------|----------------------|----|---------|
| <b>Age group (%)</b>              |                           |                                   | Exact= 7.32          | -  | 0.059   |
| - 25-34 years                     | 12 (24)                   | 1 (5)                             |                      |    |         |
| - 35-44 years                     | 13 (26)                   | 2 (10)                            |                      |    |         |
| - 45-54 years                     | 10 (20)                   | 6 (30)                            |                      |    |         |
| - ≥ 55 years                      | 15 (30)                   | 11 (55)                           |                      |    |         |
| <b>Sex (%)</b>                    |                           |                                   | X <sup>2</sup> =0.54 | 1  | 0.46    |
| - Male                            | 17 (34)                   | 5 (25)                            |                      |    |         |
| - Female                          | 33 (66)                   | 15 (75)                           |                      |    |         |
| <b>Province of employment (%)</b> |                           |                                   | Exact= 16.45         | -  | 0.09    |
| - Brabant                         | 6 (12)                    | .                                 |                      |    |         |
| - Caribbean Netherlands*          | 1 (2)                     | .                                 |                      |    |         |
| - Drenthe                         | .                         | 1 (5)                             |                      |    |         |
| - Flevoland                       | 1 (2)                     | .                                 |                      |    |         |
| - Friesland                       | 1 (2)                     | 1 (5)                             |                      |    |         |
| - Gelderland                      | 10 (20)                   | 4 (20)                            |                      |    |         |
| - Groningen                       | 1 (2)                     | 4 (20)                            |                      |    |         |
| - Limburg                         | 5 (10)                    | 2 (10)                            |                      |    |         |
| - North-Holland                   | 9 (18)                    | 4 (20)                            |                      |    |         |
| - Overijssel                      | 6 (12)                    | .                                 |                      |    |         |
| - Utrecht                         | 3 (6)                     | 1 (5)                             |                      |    |         |
| - Zeeland                         | .                         | 1 (5)                             |                      |    |         |
| - South-Holland                   | 7 (14)                    | 2 (10)                            |                      |    |         |
| <b>Role (%)</b>                   |                           |                                   | X <sup>2</sup> =1.1  | 1  | 0.3     |
| - Nurse                           | 23 (51.1)                 | 7 (36.8)                          |                      |    |         |
| - Doctor                          | 22 (48.9)                 | 12 (63.2)                         |                      |    |         |
| <b>Experience with CT (%)</b>     |                           |                                   | Exact= 6.97          | -  | 0.13    |
| - 0-5 years                       | 13 (26)                   | 3 (15)                            |                      |    |         |
| - 6-10 years                      | 14 (28)                   | 4 (20)                            |                      |    |         |
| - 11-15 years                     | 12 (24)                   | 2 (10)                            |                      |    |         |
| - 16-20 years                     | 5 (10)                    | 5 (25)                            |                      |    |         |
| - ≥ 21 years                      | 6 (12)                    | 6 (30)                            |                      |    |         |
